# Supplementary material
Source: MDPI journal article supplement (https://www.mdpi.com/2073-4344/12/2/168)
Supplement: s1 [file s1 › catalysts-1514042-supplementary.pdf]

**Approaching to the characterization of monolithic catalysts based on La perovskite-like oxides and their application for VOC oxidation under simulated indoor environment conditions**

Ornel Padilla, Jessica Múnera, Jaime Gallego\*, Alexander Santamaría\*

Química de Recursos Energéticos y Medio Ambiente, Instituto de Química, Facultad de Ciencias Exactas y Naturales, Universidad de Antioquia UdeA, Calle 70 No. 52-21, Medellín, Colombia

\*Corresponding authors.

E-mail addresses:

[alexander.santamaria@udea.edu.co](mailto:alexander.santamaria@udea.edu.co) (A. Santamaría)

[andres.gallego@udea.edu.co](mailto:andres.gallego@udea.edu.co) (J. Gallego).

**Tabla S1.** Review about oxide-type materials used as catalysts for VOC oxidation.

| Catalyst                                             | Metal composition | VOC               | VOC conversion | Oxidation temperature | Paper title                                                                                                                         |
|------------------------------------------------------|-------------------|-------------------|----------------|-----------------------|-------------------------------------------------------------------------------------------------------------------------------------|
|                                                      |                   |                   | [%]            | [°C]                  |                                                                                                                                     |
| CeO <sub>2</sub>                                     | Ce                | Trichloroethylene | 50             | 160                   | Low-temperature catalytic combustion of trichloroethylene over cerium oxide and catalyst deactivation                               |
| CeO <sub>2</sub>                                     | Ce                | Trichloroethylene | 50             | 425                   | Catalytic purification of waste gases containing VOC mixtures with Ce/Zr solid solutions                                            |
| ZrO <sub>2</sub>                                     | Zr                | Trichloroethylene | 50             | 440                   | Catalytic purification of waste gases containing VOC mixtures with Ce/Zr solid solutions                                            |
| Ce <sub>0.5</sub> Zr <sub>0.5</sub> O <sub>2</sub>   | Ce Zr             | Trichloroethylene | 50             | 390                   | Catalytic purification of waste gases containing VOC mixtures with Ce/Zr solid solutions                                            |
| Ce <sub>0.15</sub> Zr <sub>0.85</sub> O <sub>2</sub> | Ce Zr             | Trichloroethylene | 50             | 385                   | Catalytic purification of waste gases containing VOC mixtures with Ce/Zr solid solutions                                            |
| CeO <sub>2</sub>                                     | Ce                | Toluene           | 50             | 590                   | Catalytic combustion of volatile organic compounds on gold/cerium oxide catalysts                                                   |
| Au/CeO <sub>2</sub>                                  | Au Ce             | Toluene           | 50             | 260                   | Catalytic combustion of volatile organic compounds on gold/cerium oxide catalysts                                                   |
| Au/TiO <sub>2</sub>                                  | Au Ti             | n-Hexane          | 50             | 250                   | Investigation of the preparation and activity of gold catalysts in the total oxidation of n-hexane                                  |
| Au/r-MnO <sub>2</sub>                                | Au Mn             | n-Hexane          | 50             | 160                   | Investigation of the preparation and activity of gold catalysts in the total oxidation of n-hexane                                  |
| Cr-Cu/SiCl <sub>4</sub> -Z                           | Cr Cu             | Trichloroethylene | 50             | 400                   | Combustion of chlorinated volatile organic compounds (VOCs) using bimetallic chromium-copper supported on modified H-ZSM-5 catalyst |
| MnO <sub>2</sub>                                     | Mn                | n-Hexane          | 50             | 190                   | Extent of the participation of lattice oxygen from g-MnO <sub>2</sub> in VOCs total oxidation: Influence of the VOCs nature         |
| Mn <sub>0.4</sub> Zr <sub>0.6</sub> O <sub>2</sub>   | Mn Zr             | Dichloroethylene  | 50             | 305                   | Structure of Mn–Zr mixed oxides catalysts and their catalytic performance in the gas-phase oxidation of chlorocarbons               |
| Mn <sub>0.4</sub> Zr <sub>0.6</sub> O <sub>2</sub>   | Mn Zr             | Trichloroethylene | 50             | 315                   | Structure of Mn–Zr mixed oxides catalysts and their catalytic performance in the gas-phase oxidation of chlorocarbons               |

| Catalyst               | Metal composition |    | VOC           | VOC conversion | Oxidation temperature | Paper title                                                                                                             |                                                                                                                                    |  |
|------------------------|-------------------|----|---------------|----------------|-----------------------|-------------------------------------------------------------------------------------------------------------------------|------------------------------------------------------------------------------------------------------------------------------------|--|
|                        |                   |    |               | [%]            | [°C]                  |                                                                                                                         |                                                                                                                                    |  |
| Mn0,5-Ce0,5            | Mn                | Ce | Ethanol       | 50             | 190                   | VOC oxidation over MnOx–CeO2 catalysts prepared by a combustion method                                                  |                                                                                                                                    |  |
| Mn0,5-Ce0,6            | Mn                | Ce | Ethyl acetate | 50             | 210                   | VOC oxidation over MnOx–CeO2 catalysts prepared by a combustion method                                                  |                                                                                                                                    |  |
| Mn9Cu1                 | Mn                | Cu | Ethanol       | 50             | 192                   | Evaluation and characterization of Mn–Cu mixed oxide catalysts for ethanol total oxidation: Influence of copper content |                                                                                                                                    |  |
| LaFe0,7Ni0,3O3         | Fe                | Ni | La            | Ethanol        | 50                    | 220                                                                                                                     | Surface properties and performance for VOCs combustion of LaFe1 yNiyO3 perovskite oxides                                           |  |
| LaFe0,7Ni0,3O3         | Fe                | Ni | La            | Acetyl acetate | 50                    | 282                                                                                                                     | Surface properties and performance for VOCs combustion of LaFe1 yNiyO3 perovskite oxides                                           |  |
| 20%LaCoO3/Ce0,9Zr0,1O2 | Co                |    | La            | Toluene        | 50                    | 192                                                                                                                     | Ceria-based oxides as supports for LaCoO3 perovskite; catalysts for total oxidation of VOC                                         |  |
| 10%LaCoO3/Ce0,9Zr0,1O2 | Co                |    | La            | Toluene        | 50                    | 268                                                                                                                     | Ceria-based oxides as supports for LaCoO3 perovskite; catalysts for total oxidation of VOC                                         |  |
| Ce0,9Zr0,1O2           | Ce                | Zr |               | Toluene        | 50                    | 295                                                                                                                     | Ceria-based oxides as supports for LaCoO3 perovskite; catalysts for total oxidation of VOC                                         |  |
| LaCoO3                 | Co                |    | La            | Toluene        | 50                    | 244                                                                                                                     | Ceria-based oxides as supports for LaCoO3 perovskite; catalysts for total oxidation of VOC                                         |  |
| Cr-PILC                | Cr                |    |               | Chlorobenzene  | 50                    | 420                                                                                                                     | Catalytic oxidation of aromatic VOCs with Cr or Pd-impregnated Al-pillared bentonite: Byproduct formation and deactivation studies |  |
| Cr-PILC                | Cr                |    |               | Xylene         | 100                   | 600                                                                                                                     | Catalytic oxidation of aromatic VOCs with Cr or Pd-impregnated Al-pillared bentonite: Byproduct formation and deactivation studies |  |
| Ag-HY                  | Ag                |    |               | Butyl acetate  | 50                    | 325                                                                                                                     | Catalytic oxidation of butyl acetate over silver-loaded zeolites                                                                   |  |
| Ag-HZSM-5              | Ag                |    |               | Butyl Alcohol  | 50                    | 350                                                                                                                     | Catalytic oxidation of butyl acetate over silver-loaded zeolites                                                                   |  |
| Ag-HY                  | Ag                |    |               | Toluene        | 100                   | 290                                                                                                                     | Design of dual functional adsorbent/catalyst system for the control of VOC’s by using metal-loaded hydrophobic Y-zeolites          |  |

| Catalyst                                             | Metal composition |        | VOC            | VOC conversion | Oxidation temperature | Paper title                                                                                                                                                 |
|------------------------------------------------------|-------------------|--------|----------------|----------------|-----------------------|-------------------------------------------------------------------------------------------------------------------------------------------------------------|
|                                                      |                   |        |                | [%]            | [°C]                  |                                                                                                                                                             |
| Mn <sub>0.4</sub> Zr <sub>0.6</sub> O <sub>2</sub>   | Mn                | Zr     | Toluene        | 98             | 280                   | Catalytic oxidation of toluene on Mn-containing mixed oxides prepared in reverse microemulsions                                                             |
| Mn <sub>2</sub> O <sub>3</sub>                       | Mn                |        | Toluene        | 98             | 280                   | Catalytic oxidation of toluene on Mn-containing mixed oxides prepared in reverse microemulsions                                                             |
| Mn <sub>0.4</sub> Fe <sub>0.6</sub>                  | Fe                | Mn     | Toluene        | 98             | 300                   | Catalytic oxidation of toluene on Mn-containing mixed oxides prepared in reverse microemulsions                                                             |
| Mn <sub>0.4</sub> Co <sub>0.6</sub>                  | Co                | Mn     | Toluene        | 98             | 270                   | Catalytic oxidation of toluene on Mn-containing mixed oxides prepared in reverse microemulsions                                                             |
| Mn <sub>0.4</sub> Cu <sub>0.6</sub>                  | Cu                | Mn     | Toluene        | 98             | 240                   | Catalytic oxidation of toluene on Mn-containing mixed oxides prepared in reverse microemulsions                                                             |
| Mn <sub>0.67</sub> Cu <sub>0.33</sub>                | Mn                | Cu     | Toluene        | 98             | 220                   | Catalytic oxidation of toluene on Mn-containing mixed oxides prepared in reverse microemulsions                                                             |
| LaMnO <sub>3</sub>                                   | Mn                | La     | Benzene        | 50             | 301                   | Catalytic activity of LaMnO <sub>3</sub> and LaCoO <sub>3</sub> perovskites towards VOCs combustion                                                         |
| LaMnO <sub>3</sub>                                   | Mn                | La     | Isopropanol    | 50             | 216                   | Catalytic activity of LaMnO <sub>3</sub> and LaCoO <sub>3</sub> perovskites towards VOCs combustion                                                         |
| LaMnO <sub>3</sub>                                   | Mn                | La     | Acetone        | 50             | 203                   | Catalytic activity of LaMnO <sub>3</sub> and LaCoO <sub>3</sub> perovskites towards VOCs combustion                                                         |
| LaCoO <sub>3</sub>                                   | Co                | La     | Toluene        | 50             | 163                   | Catalytic activity of nanometer La <sub>1-x</sub> Sr <sub>x</sub> CoO <sub>3</sub> (x = 0, 0.2) perovskites towards VOCs combustion                         |
| LaCoO <sub>3</sub>                                   | Co                | La     | Propyl alcohol | 50             | 150                   | Catalytic activity of nanometer La <sub>1-x</sub> Sr <sub>x</sub> CoO <sub>3</sub> (x = 0, 0.2) perovskites towards VOCs combustion                         |
| La <sub>0.8</sub> Sr <sub>0.2</sub> CoO <sub>3</sub> | Co                | La, Sr | Toluene        | 50             | 160                   | Catalytic activity of nanometer La <sub>1-x</sub> Sr <sub>x</sub> CoO <sub>3</sub> (x = 0, 0.2) perovskites towards VOCs combustion                         |
| La <sub>0.8</sub> Sr <sub>0.2</sub> CoO <sub>3</sub> | Co                | La, Sr | Propyl alcohol | 50             | 150                   | Catalytic activity of nanometer La <sub>1-x</sub> Sr <sub>x</sub> CoO <sub>3</sub> (x = 0, 0.2) perovskites towards VOCs combustion                         |
| La <sub>0.9</sub> Ce <sub>0.1</sub> CoO <sub>3</sub> | Co                | La, Ce | Methane        | 50             | 365                   | Effects of iron and cerium in La <sub>1-y</sub> Ce <sub>y</sub> Co <sub>1-x</sub> Fe <sub>x</sub> O <sub>3</sub> perovskites as catalysts for VOC oxidation |

| Catalyst          | Metal composition |        | VOC           | VOC conversion | Oxidation temperature | Paper title                                                                               |                                                                                                                                                              |
|-------------------|-------------------|--------|---------------|----------------|-----------------------|-------------------------------------------------------------------------------------------|--------------------------------------------------------------------------------------------------------------------------------------------------------------|
|                   |                   |        |               | [%]            | [°C]                  |                                                                                           |                                                                                                                                                              |
| LaCoO3            | Co                | La     | Methane       | 50             | 418                   | Effects of iron and cerium in La1yCeyCo1xFexO3 perovskites as catalysts for VOC oxidation |                                                                                                                                                              |
| LaFeO3            | Fe                | La     | Methane       | 50             | 595                   | Effects of iron and cerium in La1yCeyCo1xFexO3 perovskites as catalysts for VOC oxidation |                                                                                                                                                              |
| La0,9Ce0,1CoO3    | Co                | La, Ce | Methanol      | 50             | 112                   | Effects of iron and cerium in La1yCeyCo1xFexO3 perovskites as catalysts for VOC oxidation |                                                                                                                                                              |
| LaCoO3            | Co                | La     | Methanol      | 50             | 154                   | Effects of iron and cerium in La1yCeyCo1xFexO3 perovskites as catalysts for VOC oxidation |                                                                                                                                                              |
| LaFeO3            | Fe                | La     | Methanol      | 50             | 209                   | Effects of iron and cerium in La1yCeyCo1xFexO3 perovskites as catalysts for VOC oxidation |                                                                                                                                                              |
| Cu0,15Ce0,85      | Ce                | Cu     | Ethyl acetate | 50             | 223                   | VOC oxidation over CuO–CeO2 catalysts prepared by a combustion method                     |                                                                                                                                                              |
| CuO               | Cu                |        | Ethyl acetate | 50             | 278                   | VOC oxidation over CuO–CeO2 catalysts prepared by a combustion method                     |                                                                                                                                                              |
| Cu0,15Ce0,85      | Ce                | Cu     | Toluene       | 50             | 232                   | VOC oxidation over CuO–CeO2 catalysts prepared by a combustion method                     |                                                                                                                                                              |
| CuO               | Cu                |        | Toluene       | 50             | 265                   | VOC oxidation over CuO–CeO2 catalysts prepared by a combustion method                     |                                                                                                                                                              |
| Co4MnAl+K         | Co                | Mn     | Al            | Toluene        | 50                    | 145                                                                                       | Modification of Co–Mn–Al mixed oxide with potassium and its effect on deep oxidation of VOC                                                                  |
| LaMn0,25Co0,75O3  | Co                | Mn     | La            | 2-propanol     | 50                    | 165                                                                                       | Physical–chemical property and activity evaluation of LaB0.5Co0.5O 3 (B = Cr, Mn, Cu) and LaMnxCo1xO3(x = 0.1, 0.25, 0.5) nano perovskites in VOC combustion |
| CoMn/AC           | Mn                | Co     |               | Toluene        | 50                    | 232                                                                                       | Phenyl VOCs catalytic combustion on supported CoMn/AC oxide catalyst                                                                                         |
| CoMn/AC           | Mn                | Co     |               | Ethyl benzene  | 50                    | 238                                                                                       | Phenyl VOCs catalytic combustion on supported CoMn/AC oxide catalyst                                                                                         |
| Ce/Al-MSPs(50/25) | Ce                |        | Al            | Acetone        | 50                    | 120                                                                                       | A comparative investigation on the low-temperature catalytic oxidation of acetone over porous aluminosilicate-supported cerium oxides                        |

| Catalyst       | Metal composition | VOC           | VOC conversion | Oxidation temperature | Paper title                                                                                                                                                  | — |
|----------------|-------------------|---------------|----------------|-----------------------|--------------------------------------------------------------------------------------------------------------------------------------------------------------|---|
|                |                   |               | [%]            | [°C]                  |                                                                                                                                                              |   |
| Co/M_Clay      | Co                | Propylene     | 50             | 302                   | Catalytic complete oxidation of acetylene and propene over clay versus cordierite honeycomb monoliths without and with chemical vapor deposited cobalt oxide |   |
| Co/M_Crd       | Co                | Propylene     | 50             | 363                   | Catalytic complete oxidation of acetylene and propene over clay versus cordierite honeycomb monoliths without and with chemical vapor deposited cobalt oxide |   |
| Cu0.3Ce0.7Ox   | Ce Cu             | Toluene       | 50             | 187                   | Low-temperature removal of toluene and propanal over highly activemesoporous CuCeOx catalysts synthesized via a simple self-precipitation protocol           |   |
| Cu0.3Ce0.7Ox   | Ce Cu             | Propanal      | 50             | 172                   | Low-temperature removal of toluene and propanal over highly activemesoporous CuCeOx catalysts synthesized via a simple self-precipitation protocol           |   |
| CuO/CX         | Cu                | Ethyl acetate | 50             | 255                   | Exotemplated copper, cobalt, iron, lanthanum and nickel oxides for catalytic oxidation of ethyl acetate                                                      |   |
| NiO/CX         | Ni                | Ethyl acetate | 50             | 255                   | Exotemplated copper, cobalt, iron, lanthanum and nickel oxides for catalytic oxidation of ethyl acetate                                                      |   |
| Fe2O3/CX       | Fe                | Ethyl acetate | 50             | 280                   | Exotemplated copper, cobalt, iron, lanthanum and nickel oxides for catalytic oxidation of ethyl acetate                                                      |   |
| La2O3/CX       | La                | Ethyl acetate | 50             | 290                   | Exotemplated copper, cobalt, iron, lanthanum and nickel oxides for catalytic oxidation of ethyl acetate                                                      |   |
| Co3O4/CX       | Co                | Ethyl acetate | 50             | 233                   | Exotemplated copper, cobalt, iron, lanthanum and nickel oxides for catalytic oxidation of ethyl acetate                                                      |   |
| CeO2/CX        | Ce                | Ethyl acetate | 50             | 255                   | Total oxidation of ethyl acetate, ethanol and toluene catalyzed by exotemplated manganese and cerium oxides loaded with gold                                 |   |
| MnxOy/CX       | Mn                | Ethyl acetate | 50             | 245                   | Total oxidation of ethyl acetate, ethanol and toluene catalyzed by exotemplated manganese and cerium oxides loaded with gold                                 |   |
| La0.7Ca0.3MnO3 | Mn La, Ca         | n-Hexane      | 50             | 265                   | La1-xCaxMnO3 perovskites as catalysts for total oxidation of volatile organic compounds                                                                      |   |

| Catalyst                                                                               | Metal composition |    |        | VOC                             | VOC conversion | Oxidation temperature | Paper title                                                                                                                                                  |  |
|----------------------------------------------------------------------------------------|-------------------|----|--------|---------------------------------|----------------|-----------------------|--------------------------------------------------------------------------------------------------------------------------------------------------------------|--|
|                                                                                        |                   |    |        |                                 | [%]            | [°C]                  |                                                                                                                                                              |  |
| LaMnO <sub>3</sub>                                                                     | Mn                | La |        | Ethanol                         | 50             | 176                   | La <sub>1-x</sub> CaxMnO <sub>3</sub> perovskites as catalysts for total oxidation of volatile organic compounds                                             |  |
| La <sub>0.6</sub> Sr <sub>0.4</sub> Co <sub>0.2</sub> Fe <sub>0.8</sub> O <sub>3</sub> | Fe                | Co | La, Sr | Propane                         | 50             | 325                   | Synthesis, characterization and catalytic performance of LSCF perovskite for VOC combustion                                                                  |  |
| La <sub>0.6</sub> Sr <sub>0.4</sub> Co <sub>0.2</sub> Fe <sub>0.8</sub> O <sub>3</sub> | Fe                | Co | La, Sr | Ethanol                         | 50             | 200                   | Synthesis, characterization and catalytic performance of LSCF perovskite for VOC combustion                                                                  |  |
| LaCoO <sub>3</sub>                                                                     | Co                | La |        | CH <sub>2</sub> Cl <sub>2</sub> | 75             | 500                   | Study of the formation of LaMO <sub>3</sub> (M = Co, Mn) perovskites by propionates precursors: application to the catalytic destruction of chlorinated VOCs |  |
| LaMnO <sub>3</sub>                                                                     | Mn                | La |        | CH <sub>2</sub> Cl <sub>2</sub> | 98             | 500                   | Study of the formation of LaMO <sub>3</sub> (M = Co, Mn) perovskites by propionates precursors: application to the catalytic destruction of chlorinated VOCs |  |

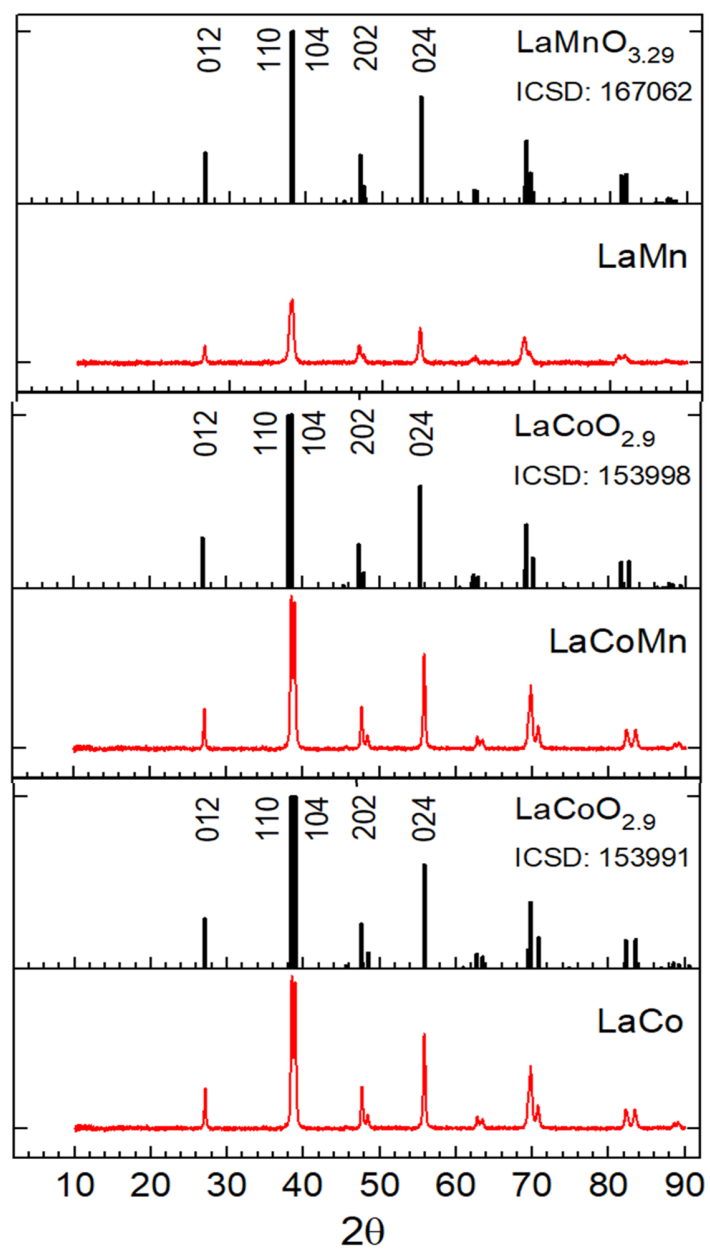

**Figure S1.** Comparison of diffractograms from the materials obtained and their matched ICSD reference profiles.

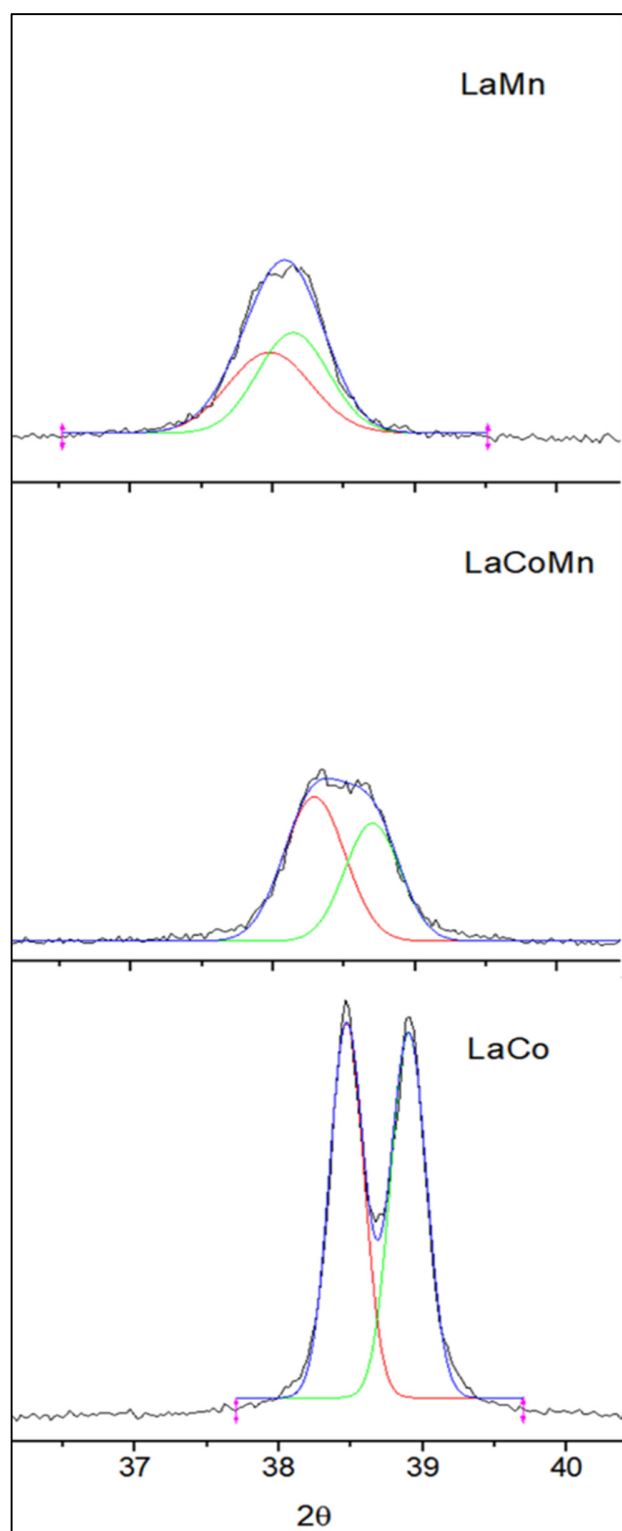

**Figure S2.** Deconvolution of peaks around  $38^\circ$  for analysis of crystallite size.

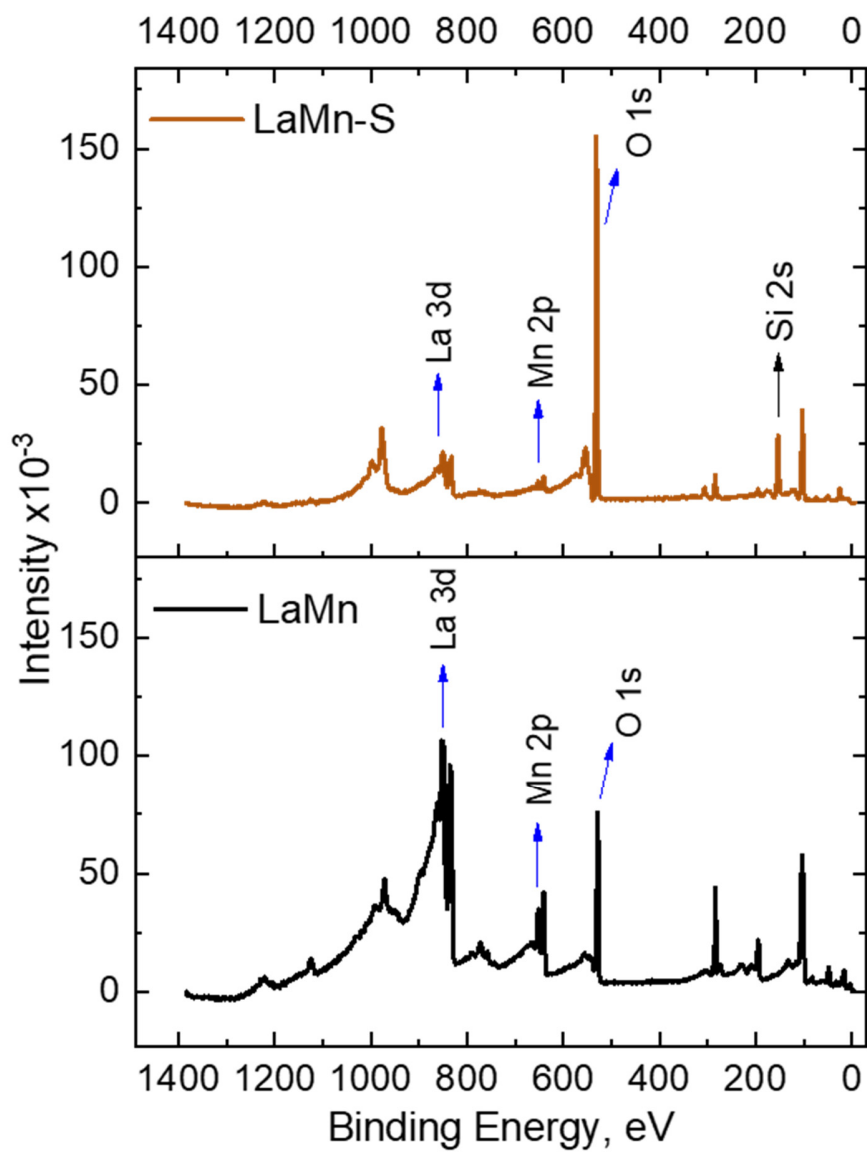

Figure S3. General XPS survey for powder (bottom) and monolithic La-Mn based catalysts (upper).

**Table S2.** High-resolution XPS for O 1s species in powder and monolithic catalysts.

| System          | O       |                          |         |                          |         |                          |
|-----------------|---------|--------------------------|---------|--------------------------|---------|--------------------------|
|                 | OI      |                          | OII     |                          | OIII    |                          |
|                 | BE (eV) | Atomic concentration (%) | BE (eV) | Atomic concentration (%) | BE (eV) | Atomic concentration (%) |
| <b>LaCo</b>     | 528.4   | 40.0                     | 530.9   | 53.4                     | 533.2   | 6.6                      |
| <b>LaCo-S</b>   | 528.5   | 3.3                      | 530.5   | 26.7                     | 532.3   | 70.0                     |
| <b>LaCoMn</b>   | 528.9   | 39.0                     | 531.2   | 56.0                     | 533.4   | 5.0                      |
| <b>LaCoMn-S</b> | 528.9   | 1.2                      | 531.4   | 32.3                     | 532.6   | 66.5                     |
| <b>LaMn</b>     | 529.1   | 55.5                     | 530.8   | 23.1                     | 532.2   | 21.4                     |
| <b>LaMn-S</b>   | 529.2   | 7.2                      | 531.3   | 27.3                     | 532.1   | 65.5                     |

ND: Not Detected

**Table S3.** High-resolution XPS for La 3d species in powder and monolithic catalysts.

| System          | La                           |          |                              |          |
|-----------------|------------------------------|----------|------------------------------|----------|
|                 | La I                         |          | La II                        |          |
|                 | BE (eV)<br>[3d 5/2 ; 3d 3/2] | Conc (%) | BE (eV)<br>[3d 5/2 ; 3d 3/2] | Conc (%) |
| <b>LaCo</b>     | [832.4 ; 849.3]              | 43.0     | [834.4 ; 850.9]              | 57.0     |
| <b>LaCo-S</b>   | ND                           |          | [834.0 ; 850.7]              | 100      |
| <b>LaCoMn</b>   | [833.3 ; 850.1]              | 25.7     | [834.6 ; 851.6]              | 74.3     |
| <b>LaCoMn-S</b> | ND                           |          | [834.6 ; 851.3]              | 100      |
| <b>LaMn</b>     | [833.1 ; 849.9]              | 55.8     | [834.7 ; 851.2]              | 44.2     |
| <b>LaMn-S</b>   | [833.3 ; 850.0]              | 100      | ND                           |          |

ND: Not Detected

**Table S 4.** High-resolution XPS for Co 2p species in powder and monolithic catalysts.

| System   | Co                           |             |                              |             |
|----------|------------------------------|-------------|------------------------------|-------------|
|          | Co2+                         |             | Co3+                         |             |
|          | BE (eV)<br>[2p 3/2 ; 2p 1/2] | Conc<br>(%) | BE (eV)<br>[2p 3/2 ; 2p 1/2] | Conc<br>(%) |
|          |                              |             |                              |             |
| LaCo     | [779.2 ; 794.2]              | 51.0        | [780.7 ; 795.5]              | 49.0        |
| LaCo-S   | [778.9 ; 794.5]              | 30.5        | [780.4 ; 796.3]              | 69.5        |
| LaCoMn   | [779.6 ; 794.8]              | 60.4        | [780.9 ; 796.6]              | 39.6        |
| LaCoMn-S | [779.7 ; ND]                 | 30.8        | [781.1 ; ND]                 | 69.2        |

ND: Not Detected

**Table S5.** High-resolution XPS for Mn 2p species in powder and monolithic catalysts.

| System   | Mn                           |             |                              |             |
|----------|------------------------------|-------------|------------------------------|-------------|
|          | Mn3+                         |             | Mn4+                         |             |
|          | BE (eV)<br>[2p 3/2 ; 2p 1/2] | Conc<br>(%) | BE (eV)<br>[2p 3/2 ; 2p 1/2] | Conc<br>(%) |
|          |                              |             |                              |             |
| LaCoMn   | [642.1 ; 653.6]              | 64.3        | [644.8 ; 656.2]              | 35.7        |
| LaCoMn-S | [641.5 ; ND]                 | 79.6        | [645.3 ; ND]                 | 20.4        |
| LaMn     | [641.5 ; 653.1]              | 74.6        | [644.3 ; 656.8]              | 25.4        |
| LaMn-S   | [641.0 ; ND]                 | 71.4        | [644.1 ; ND]                 | 28.6        |

ND: Not Detected

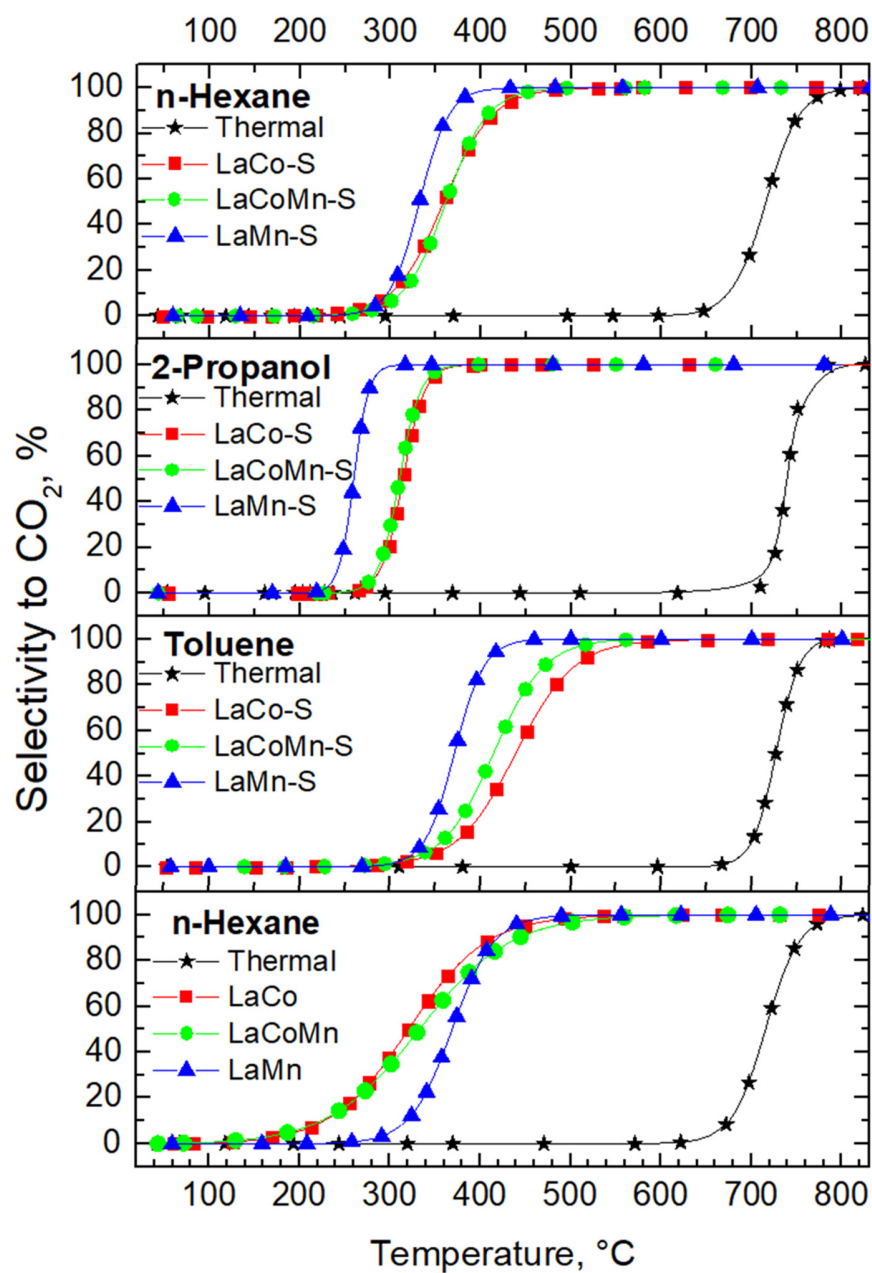

**Figure S4.** Comparative plot of n-hexane oxidation using powder catalysts and the oxidation of other VOC (n-hexane, 2-propanol, and toluene) using monolithic catalysts.
